# Supplementary material for: PhoglyStruct: Prediction of phosphoglycerylated lysine residues using structural properties of amino acids
Source: PubMed Central journal article supplement (PMC6299098; doi:10.1038/s41598-018-36203-8), 2018-12-18
Supplement: 41598_2018_36203_MOESM1_ESM.pdf [file 41598_2018_36203_MOESM1_ESM.pdf]

## PhoglyStruct: Prediction of phosphoglycerylated lysine residues using structural properties of amino acids

Abel Chandra<sup>5,\*,1</sup>, Alok Sharma<sup>1,2,3,5,9\*,1</sup>, Abdollah Dehzangi<sup>4</sup>, Shoba Ranganathan<sup>6</sup>, Anjeela Jokhan<sup>7</sup>, Kuo-Chen Chou<sup>8,&</sup>, Tatsuhiko Tsunoda<sup>2,3,9,&</sup>

<sup>1</sup>Correspondence: [abelavit@gmail.com](mailto:abelavit@gmail.com); alok.sharma@griffith.edu.au

\*Equal Contributors

&Last Authors

<sup>1</sup>Institute for Integrated and Intelligent Systems, Griffith University, Brisbane, QLD-4111, Australia.

<sup>2</sup>Department of Medical Science Mathematics, Medical Research Institute, Tokyo Medical and Dental University, Tokyo, Japan

<sup>3</sup>Laboratory for Medical Science Mathematics, RIKEN Center for Integrative Medical Sciences, Yokohama, Kanagawa, Japan

<sup>4</sup>Department of Computer Science, Morgan State University, Baltimore, Maryland, USA

<sup>5</sup>School of Engineering and Physics, Faculty of Science, Technology and Environment, University of the South Pacific, Suva, Fiji Islands

<sup>6</sup>Department of Molecular Sciences, Macquarie University, Sydney, NSW 2109, Australia

<sup>7</sup>Faculty of Science, Technology and Environment, University of the South Pacific, Suva, Fiji Islands

<sup>8</sup>The Gordon Life Science Institute, Boston, MA 02478, USA

<sup>9</sup>CREST, JST, Tokyo 113-8510, Japan

### Supplement 1: Geometric Means for the different window sizes

|             | Upstream Downstream of lysine |        |        |        |        |        |        |        |        |        |        |        |        |        |        |
|-------------|-------------------------------|--------|--------|--------|--------|--------|--------|--------|--------|--------|--------|--------|--------|--------|--------|
|             | ±1                            | ±2     | ±3     | ±4     | ±5     | ±6     | ±7     | ±8     | ±9     | ±10    | ±11    | ±12    | ±13    | ±14    | ±15    |
| Sensitivity | 0.787                         | 0.8442 | 0.7211 | 0.7814 | 0.7959 | 0.7515 | 0.8455 | 0.7208 | 0.8009 | 0.7621 | 0.7159 | 0.7223 | 0.7673 | 0.6926 | 0.6309 |
| Specificity | 0.7135                        | 0.7148 | 0.7644 | 0.751  | 0.6996 | 0.7049 | 0.664  | 0.7395 | 0.7441 | 0.7232 | 0.7372 | 0.7554 | 0.7424 | 0.7461 | 0.7644 |
| Accuracy    | 0.7302                        | 0.7475 | 0.7529 | 0.7565 | 0.7239 | 0.7162 | 0.709  | 0.7351 | 0.7589 | 0.7331 | 0.7333 | 0.7461 | 0.7481 | 0.7338 | 0.7335 |
| MCC         | 0.446                         | 0.49   | 0.4463 | 0.4785 | 0.447  | 0.402  | 0.448  | 0.414  | 0.488  | 0.432  | 0.406  | 0.431  | 0.455  | 0.399  | 0.372  |
| G-Mean      | 0.7493                        | 0.7758 | 0.7424 | 0.7660 | 0.7462 | 0.7278 | 0.7493 | 0.7301 | 0.772  | 0.7424 | 0.7265 | 0.7387 | 0.7547 | 0.7189 | 0.6944 |

## Supplement 2: Comparison of PhoglyStruct with simpler set of features

The table below shows the comparison of PhoglyStruct with simpler set of features for the same 10-fold cross-validation set. Simpler\_Features are features for each lysine taking into account the occurrence of amino acids in the  $\pm 2$  residue window. The matrix representing each lysine is of the size 20x5 where 20 is the different types of amino acid in the genome and 5 is the 2 upstream, the lysine and 2 downstream amino acid. Out of the 20 amino acids, a value of 1 is given to the amino acid present at that position otherwise the rest are given a value of 0. Therefore, the feature representing each lysine is a 100-dimensional vector. As it can be seen, PhoglyStruct, which uses the structural properties of amino acids, outperforms this simpler set of features.

| Method           | Sensitivity   | Specificity   | G-Mean        | Accuracy      | MCC           | F-Measure     | AUC           |
|------------------|---------------|---------------|---------------|---------------|---------------|---------------|---------------|
| Simpler_Features | 0.6470        | <b>0.7490</b> | 0.6887        | 0.7233        | 0.3612        | 0.5326        | 0.6982        |
| PhoglyStruct     | <b>0.8726</b> | 0.7331        | <b>0.7976</b> | <b>0.7678</b> | <b>0.5343</b> | <b>0.6513</b> | <b>0.8034</b> |
